# Supplementary figures and images for: Bifidobacterium bifidum FJSWX19M5 alleviated 2,4,6-trinitrobenzene sulfonic acid (TNBS)-induced chronic colitis by mitigating gut barrier injury and increasing regulatory T cells
Source: Royal Society of Chemistry journal article supplement (doi:10.1039/d2fo02659g), 2022-11-28

## Scores Plot

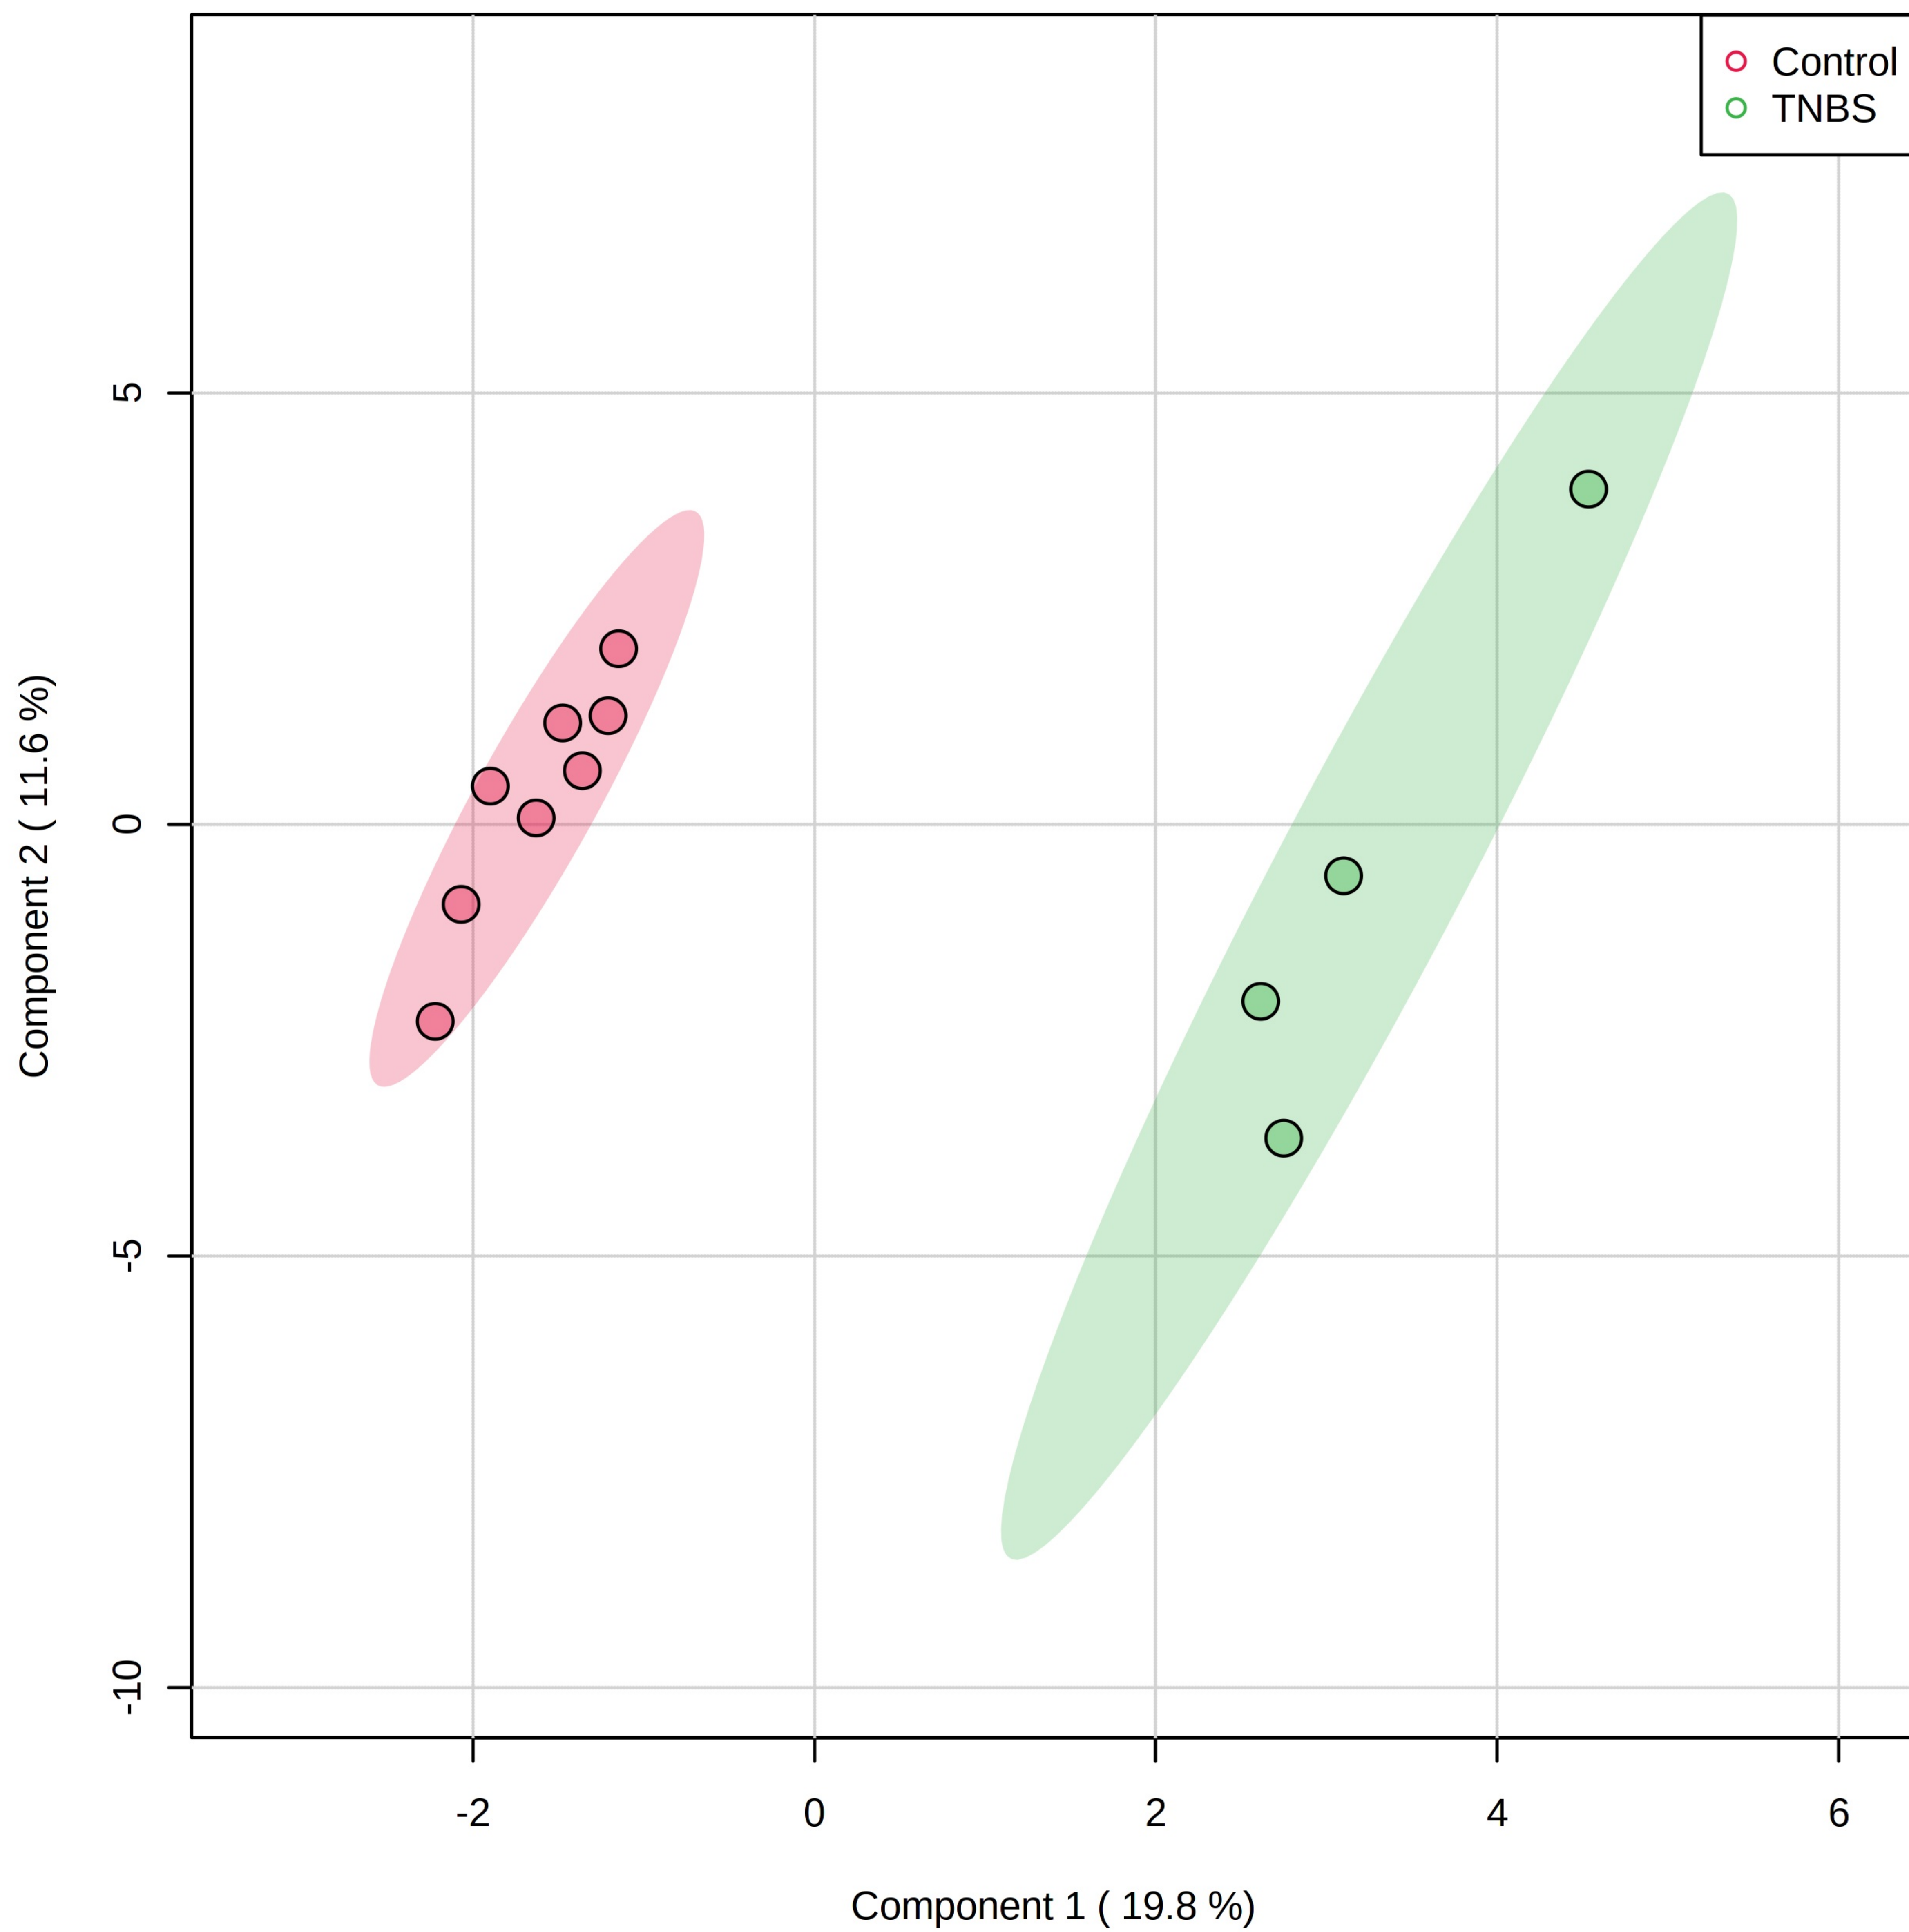

Supplement: d2fo02659g2.pdf [file d2fo02659g2.pdf]
